# Supplementary material
Source: ML conference proceedings conference paper supplement (https://proceedings.mlr.press/v51/lim16.html)
Supplement: Supplementary file 1 [file lim16-supp.pdf]

## A Derivation of Dual Formulation (5)

Let  $C$  denote the feasible set in problem (2). We have  $d_i(x_i) = \max_{y_i} \{\langle y_i, x_i \rangle - d_i^*(y_i)\}$ . We can rewrite problem (2) as

$$\begin{aligned} \min_{x \in C} \sum_{i=1}^n d_i(x_i) &= \min_{x \in C} \left\{ \sum_{i=1}^n \max_{y_i} \{y_i x_i - d_i^*(y_i)\} \right\} \\ &= \min_{x \in C} \max_y \left\{ \sum_{i=1}^n (y_i x_i - d_i^*(y_i)) \right\} \\ &= \max_y \min_{x \in C} \left\{ \sum_{i=1}^n (y_i x_i - d_i^*(y_i)) \right\} \\ &= \max_y \left\{ \sum_{i=1}^n (-d_i^*(y_i)) + \min_{x \in C} \langle y, x \rangle \right\}. \end{aligned}$$

Let us focus on the  $\min_{x \in C} \langle y, x \rangle$  term. If we let  $Y_i = y_i - y_{i+1}$  for  $i \in [n-1]$  and  $Y_n = y_n$ , we have  $y_i = \sum_{l=i}^n Y_l$ . This gives us

$$\begin{aligned} \langle y, x \rangle &= \langle y, c \rangle + \langle y, x - c \rangle \\ &= \langle y, c \rangle + \sum_{i=1}^n y_i (x_i - c_i) \\ &= \langle y, c \rangle + \sum_{i=1}^n \left( \sum_{k=i}^n Y_k \right) (x_i - c_i) \\ &= \langle y, c \rangle + \sum_{k=1}^n \left( \sum_{i=1}^k (x_i - c_i) \right) Y_k. \end{aligned}$$

If any  $Y_k$  is larger than 0 for any  $k \in [n-1]$ , then  $\inf_x \langle y, x \rangle = -\infty$ ; we can set  $x_i = c_i$  for  $i \notin \{k, k+1\}$ ,  $x_k \rightarrow -\infty$  and  $x_{k+1} = c_k + c_{k+1} - x_k$ . This means that we require  $Y_k \leq 0$  for all  $k$  (i.e.  $y_{i+1} \geq y_i$ ). So  $\min_x \langle y, x \rangle = \langle y, c \rangle$ , obtained by setting  $x_i = c_i$  for all  $i$ .

## B Proofs Omitted From Main Paper

### B.1 Section 3 Proofs

**Lemma 3.1.** (Suehiro et al., 2012) *Let  $x'$  be the projection of  $z$  onto the permutohedron under a uniformly separable Bregman divergence  $\phi$ . Suppose  $z_1 \geq z_2 \geq \dots \geq z_n$ . Then, we have  $x'_1 \geq x'_2 \geq \dots \geq x'_n$ .*

*Proof.* Let  $x$  be a point in the permutohedron where  $z_i > z_j$  but  $x_i < x_j$ . The difference between the objective obtained by swapping the points  $x_i$  and  $x_j$  is given by:

$$\begin{aligned} &\Delta_\phi(x_i, z_i) + \Delta_\phi(x_j, z_j) - \Delta_\phi(x_i, z_j) - \Delta_\phi(x_j, z_i) \\ &= -\nabla\phi(z_i)(x_i - x_j) - \nabla\phi(z_j)(x_j - x_i) \\ &= -(\nabla\phi(z_i) - \nabla\phi(z_j))(x_i - x_j) > 0, \end{aligned}$$

so swapping the terms decreases the objective further and  $x$  is not the projection of  $z$ .  $\square$

**Lemma 3.2.** *Let  $x'$  be the projection of  $z$  onto the permutohedron under a uniformly separable Bregman divergence defined by a sign-invariant  $\phi$ . Then  $\text{sgn}(x'_i) = \text{sgn}(z_i)$  for all  $i$ . Furthermore, if  $|z_1| \geq |z_2| \geq \dots \geq |z_n|$ , we have  $|x'_1| \geq |x'_2| \geq \dots \geq |x'_n|$ .*

*Proof.* We will show that if  $\text{sgn}(x_i) \neq \text{sgn}(z_i)$  we can improve the objective by setting  $x_i$  to 0, implying  $x_i$  is not optimal. By the sign-invariance of  $\phi$ , we have  $\nabla\phi(u) = -\nabla\phi(-u)$ , which means  $\nabla\phi(0) = 0$ . By the strict convexity of  $\phi$ , we know  $\text{sgn}(\nabla\phi(z_i))$  is an increasing functions, so  $\text{sgn}(\nabla\phi(z_i)) = \text{sgn}(z_i)$ . The change in objective after swapping is

$$\begin{aligned} &\Delta_\phi(x_i, z_i) - \Delta_\phi(0, z_i) \\ &= \phi(x_i) - \phi(0) - \nabla\phi(z_i)(x_i - 0) \\ &\geq \phi(x_i) - \phi(0) - \nabla\phi(0)(x_i - 0) > 0, \end{aligned}$$

where the last line follows from strict convexity of  $\phi$ .

The proof of the second part is similar to the proof of lemma 3.1.  $\square$

**Theorem 3.3.** *Let  $y^A \in \mathbb{R}^n$  be an optimal solution to problem (5). We get an optimal solution to problem (6) by truncating the positive values of  $y^A$  to zero.*

*Proof.* We will first show that there is an optimal solution  $y^B$  to problem (6) such that if  $y_i^A > 0$ , then  $y_i^B = 0$ . Let  $y^C$  be any optimal solution to problem (6) and let  $S$  be the set of indices  $i$  where  $y_i^A > 0$  and  $y_i^C < 0$ . Suppose  $S$  is nonempty. By the monotonicity of the  $y$  vectors, we know that  $S$  is an interval of indices  $\{a, a+1, \dots, b\}$ , and  $y_i^C = 0$  for  $i > b$  and  $y_i^A < 0$  for  $i < a$ . Let  $v$  denote the vector that is  $y_i^A - y_i^C$  for  $i \in S$  and 0 otherwise, and note that  $v$  is nonnegative. We will now compare  $\sum_{i \in S} f_i(y_i^A)$  and  $\sum_{i \in S} f_i(y_i^C)$ .

- If  $\sum_{i \in S} f_i(y_i^A) > \sum_{i \in S} f_i(y_i^C)$ , then we can pick some  $\epsilon > 0$  such that  $y^A - \epsilon v$  is a valid solution for problem (5) that has a lower objective than  $y^A$ , a contradiction.
- If  $\sum_{i \in S} f_i(y_i^A) < \sum_{i \in S} f_i(y_i^C)$ , we get a similar contradiction to the optimality of  $y^C$ .

Hence, the two sums must be equal, and we can now pick  $\delta > 0$  such that  $y^C + \delta v$  has one less negative term. This reduces the size of set  $S$  by one, and we can repeat the process until we obtain a  $y^B$  where if  $y_i^A > 0$ , then  $y_i^B = 0$ .

We can now assume we have an optimal solution  $y^B$  to problem (6) such that if  $y_i^B < 0$ , then  $y_i^A \leq 0$ . Let

$k$  denote the largest index where  $y_k^B < 0$ . We can form two new vectors  $y^D$  and  $y^E - y^D$  is  $y^A$  with all values truncated to be less than or equal to zero, and  $y_i^E$  is  $y_i^B$  for  $i \leq k$  and  $y_i^A$  for  $i > k$ .  $y^D$  and  $y^E$  are feasible for problem (6) and problem (5) respectively. If  $y^D$  is not optimal for problem (6) one can show that  $y^E$  has a lower objective value than  $y^A$ , contradicting the optimality of  $y^A$  for problem (5).  $\square$

## B.2 Section 4 Proofs

**Lemma 4.3.**  $\text{PoolV}_{\phi,z}(S)$  satisfies

$$\sum_{i \in S} (\nabla \phi)^{-1}(\gamma + \nabla \phi(z_i)) = \sum_{i \in S} c_i. \quad (9)$$

*Proof.* We will set the derivative of  $\sum_{i \in S} f_i(\gamma)$  to zero:

$$\begin{aligned} 0 &= \nabla_{\gamma} \left( \sum_{i \in S} d_i^*(\gamma) - \gamma \sum_{i \in S} c_i \right) \\ &= \sum_{i \in S} \nabla_{\gamma} (d_i^*(\gamma)) - \sum_{i \in S} c_i \\ &= \sum_{i \in S} \nabla_{\gamma} (\gamma x'_i - \phi(x'_i) + \nabla \phi(z_i) x'_i) - \sum_{i \in S} c_i \\ &= \sum_{i \in S} (x'_i + \gamma \nabla_{\gamma} (x'_i) - \nabla \phi((\nabla \phi)^{-1}(\gamma + \nabla \phi(z_i))) \nabla_{\gamma} (x'_i) \\ &\quad + \nabla \phi(z_i) \nabla_{\gamma} (x'_i)) - \sum_{i \in S} c_i \\ &= \sum_{i \in S} x'_i - \sum_{i \in S} c_i \\ &= \sum_{i \in S} (\nabla \phi)^{-1}(\gamma + \nabla \phi(z_i)) - \sum_{i \in S} c_i, \end{aligned}$$

yielding the desired equality.  $\square$

## B.3 Section 5 Proofs

**Lemma 5.3.** Consider adjacent intervals  $I_1, I_2$  and vector  $y$  where  $y_{I_1}$  and  $y_{I_2}$  are the optimal solution to dual problem (5) when restricted to only the indices in  $I_1$  and  $I_2$  respectively. The output of  $y_{I_1 \cup I_2}$  of  $\text{Merge}_f(I_1, I_2, y_{I_1 \cup I_2})$  gives the optimal solution to problem (5) when restricted to the indices in  $I_1 \cup I_2$ .

*Proof.* Suppose we have adjacent intervals  $I_1, I_2$ , and  $y_{I_1 \cup I_2}$  such that each of  $y_{I_1}, y_{I_2}$  is the optimal solution to problem (5) over just the  $I_1$  indices and just the  $I_2$  indices) respectively. We will show that the optimal solution to the problem (5) over the  $I_1 \cup I_2$  indices can be obtained from  $y_{I_1 \cup I_2}$  via at most a single pooling operation, and that  $\text{Merge}_{\{f_i\}}$  finds the right elements to pool. Note that throughout the proof, we will exploit the strict convexity of  $f_i$ , especially when we refer to Lemma 4.2.

If  $y_{I_1.\text{end}} \leq y_{I_2.\text{start}}$ , then for any  $\gamma_{\text{test}} < y_{I_1.\text{end}}$ ,  $S_{\text{test}}$  only contains indices  $i$  for  $y_i \geq \gamma_{\text{test}}$ . Since  $I_1.\text{end} \in S_{\text{test}}$  and the value  $y_{I_1.\text{end}}$  satisfies  $\gamma_{\text{test}} < y_{I_1.\text{end}}$ , we have  $\text{PoolV}_f(S_{\text{test}}) > \gamma_{\text{test}}$  by Lemma 4.2. A similar fact holds for  $\gamma_{\text{test}} > y_{I_1.\text{end}}$ , and the  $\text{Merge}_f$  algorithm terminates at  $\gamma_{\text{test}} = y_{I_1.\text{end}}$  or  $y_{I_2.\text{start}}$  and no elements are pooled together, as desired.

Now suppose  $y_{I_1.\text{end}} > y_{I_2.\text{start}}$ . We can prove the correctness of this algorithm by showing that the pooling choice the  $\text{Merge}_f$  subroutine takes can be obtained by PAV applied to just  $I_1 \cup I_2$  given values  $y_{I_1 \cup I_2}$ . Let  $S_{PAV}$  denote the elements of  $I_1 \cup I_2$  pooled together by the PAV algorithm when applied to  $y_{I_1 \cup I_2}$ .  $S_{PAV}$  is an interval that is a subset of  $\{i \in I_1 \mid y_i \geq \text{PoolV}_f(S_{PAV})\} \cup \{i \in I_2 \mid y_i \leq \text{PoolV}_f(S_{PAV})\}$ . At each iteration of the main loop in  $\text{Merge}_f$ , we will show that  $\text{PoolV}_f(S_{PAV})$  is contained in  $[\min(\mathcal{Y}), \max(\mathcal{Y})]$ . This holds initially since Lemma 4.2 means that  $\text{PoolV}_f(S_{PAV})$  must be between  $\min_{i \in I_1 \cup I_2} y_i$  and  $\max_{i \in I_1 \cup I_2} y_i$ .

Suppose we have chosen  $\gamma_{\text{test}} < \text{PoolV}_f(S_{PAV})$ . We want to show that  $\text{PoolV}_f(S_{\text{test}}) > \gamma_{\text{test}}$ , which will mean that we make the correct choice of which half of  $\mathcal{Y}$  to discard. If  $\text{PoolV}_f(S_{\text{test}}) \geq \text{PoolV}_f(S_{PAV})$ , we are done. Suppose  $\text{PoolV}_f(S_{\text{test}}) < \text{PoolV}_f(S_{PAV})$ . Then, we can define the following three consecutive intervals:  $S_1 = S_{\text{test}} \setminus S_{PAV}$ ,  $S_2 = S_{\text{test}} \cap S_{PAV}$ , and  $S_3 = S_{PAV} \setminus S_{\text{test}}$  such that  $S_{\text{test}} = S_1 \cup S_2$  and  $S_{PAV} = S_2 \cup S_3$ . Figure 4 illustrates these sets.

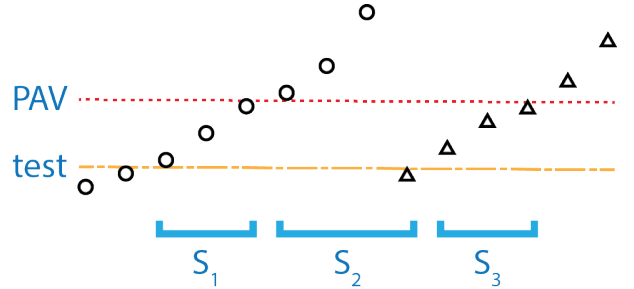

Figure 4: An example of  $S_1, S_2$ , and  $S_3$  when  $\gamma_{\text{test}} < \text{PoolV}_f(S_{PAV})$ .

Note that every element in  $y_{S_1}$  is larger than or equal to  $\gamma_{\text{test}}$ , so Lemma 4.2 implies

$$\text{PoolV}_f(S_1) \geq \gamma_{\text{test}}. \quad (10)$$

A similar argument shows that  $\text{PoolV}_f(S_3) \leq \text{PoolV}_f(S_{PAV})$ . As for  $\text{PoolV}_f(S_2)$ , Lemma 4.2 implies that  $\text{PoolV}_f(S_2) \geq \text{PoolV}_f(S_{PAV})$  since  $S_{PAV} = S_2 \cup S_3$ . Hence, we have

$$\text{PoolV}_f(S_2) \geq \text{PoolV}_f(S_{PAV}) > \gamma_{\text{test}}. \quad (11)$$

By combining inequalities (10) and (11) and applying the lemma again, we get  $\text{PoolV}_f(S_{\text{test}}) > \gamma_{\text{test}}$ .

This shows that the correct half of elements are omitted from the search range in the next iteration of `Merge`. We can apply the same reasoning to  $\gamma_{\text{test}} > \text{PoolV}_f(S_{\text{PAV}})$ . Eventually,  $\mathcal{Y}$  gets reduced until it has at most two elements, which leaves only three candidate sets of  $S_{\text{test}}$  to try out.  $\square$

**Proposition 5.5.** *The running time of `MergeAndPool` is  $O(n \log n)$  for uniformly separable Bregman divergences  $\phi$  with incremental  $\text{PoolV}_{\phi,z}$  cost.*

*Proof.* `MergeAndPool` pairs off and merges pairs of intervals in each round, and there are  $O(\log n)$  rounds in total. We will show that each call to  $\text{Merge}_{\phi,z}$  takes  $O(n)$  time.

We can find the  $\lceil |\mathcal{Y}|/2 \rceil$ th smallest value in two ordered sequences in  $O(n)$ . At each iteration, we halve the range we are selecting over, so the selection takes linear time in total. For the interval  $S_{\text{test}}$ , we half the number of elements are changing at the ends of  $S_{\text{test}}$ . Since  $\text{PoolV}_{\phi,z}$  can be computed incrementally, all the  $S_{\text{test}}$ -related work takes linear time in aggregate.  $\square$

**Lemma 5.7.** *We can sort the entries of vector  $z$  into  $d$  groups in  $O(n \log d)$  time such that the  $i$ th group has  $n_i$  elements and for each  $z_j$  in group  $i$  and  $z_k$  in group  $i + 1$ , we have  $z_j \geq z_k$ .*

*Proof.* We can apply a quicksort-like procedure where at each iteration we select the pivot that partitions the elements into two sets of roughly the same number of groups. There are  $O(\log d)$  iterations and each iteration takes  $O(n)$ .  $\square$

**Theorem 5.9.** *We can compute the projection  $x'$  onto the permutohedron  $\mathcal{PH}(c)$  under any incremental uniformly separable Bregman divergence in time  $O(n \log d)$ .*

*Proof.* We first show that running time of `MergeAndPool` when we provide a partition with  $d$  groups is  $O(n \log d)$ . There are  $O(\log d)$  iterations of the outer loop in `MergeAndPool` with one call to  $\text{Merge}_{\phi,z}$  for each pair of intervals in each iteration. We will show that each call to  $\text{Merge}_{\phi,z}$  takes  $O(|I_1| + |I_2|)$  time. Picking the  $\lceil |\mathcal{Y}|/2 \rceil$ th smallest value of  $\mathcal{Y}$  can be done in linear time using the efficient selection algorithm. The construction of  $S$ , and computation of  $\text{PoolV}_{\phi,z}$  can be done in linear time. After each iteration of the loop in  $\text{Merge}_{\phi,z}$ , the search space halves, so the amount of work required halves.

The correctness of the output follows directly from the fact that the  $\text{Merge}_{\phi,z}$  subroutine will make the same choice of elements to pool together no matter how the vector  $y_{I_1 \cup I_2}$  is permuted. In particular, this returns the same results as in the case where the indices are fully sorted.  $\square$

## B.4 Section 6 Proofs

The proof of Theorem 6.3 follows directly from the next lemma, which is the  $\epsilon$ -close analogue of Lemma 5.3.

**Lemma B.1.** *Consider adjacent intervals  $I_1, I_2$ , and let  $y'$  denote the vector where  $y'_{I_1}$  and  $y'_{I_2}$  are the solutions to problem (5) when restricted to only the indices in  $I_1$  and  $I_2$ , respectively. The output of  $\text{Merge}_f(I_1, I_2, \mathcal{L}(y'))$  is  $\mathcal{L}(y'')$ , where  $y''$  is the solution to problem (5) when restricted to the indices in  $I_1 \cup I_2$ .*

*Proof.* Firstly, we note that Lemma 5.3 does not depend on whether the sets used to form  $S_{\text{test}}$  are created using an inequality or strict inequality. Secondly, that lemma demonstrates that given any  $\gamma_{\text{test}}$ , we can correctly determine if  $\text{PoolV}_f(S_{\text{PAV}})$  is higher or lower using  $\text{PoolV}_f(S_{\text{test}})$ , and using the derivative in  $\epsilon\text{-Merge}_f$  has the same effect. Finally, we note that the sets  $S_{\text{test}}$  formed in  $\epsilon\text{-Merge}_f$  are the same regardless of whether we are given  $y'$  or  $\mathcal{L}(y')$  as the input. Together, by using Lemma 5.3, these imply that  $\epsilon\text{-Merge}_f$  is able to correctly determine the two lattice points in  $\{\epsilon k \mid k \in \mathbb{Z}\}$  that  $\text{PoolV}_f(S_{\text{PAV}})$  is between. Once these two points are found, the algorithm rounds down  $\text{PoolV}(S_{\text{PAV}})$ , thereby obtaining  $\mathcal{L}(y'')$ .  $\square$

## C Experiments on Scaling Effects of `MergeAndPool`

To show how `MergeAndPool` scales in practice and to demonstrate that the empirical performance of the algorithm aligns with the theory, we performed a set of simple experiments implemented in Julia 0.4.5. The results are shown in Figure 5.

## D An Efficient Implementation of PAV

We now describe a linked-list based implementation of the PAV algorithm for solving the dual problem (5).

---

**Algorithm 5** Pool Adjacent Violators Algorithm (PAV)

---

**Input:** strictly convex function  $\phi_i : \mathbb{R} \rightarrow \mathbb{R}$ , sorted  
 $z \in \mathbb{R}$

{Initialize Algorithm}

$S_{\text{prev}} \leftarrow \emptyset$

**for**  $i \leftarrow 1$  to  $n$  **do**

$S_{\text{curr}} \leftarrow \{i\}$

$S_{\text{curr}} \cdot \text{min} \leftarrow \text{PoolV}_{\phi, z}(S_{\text{curr}})$

Update pointers for  $S_{\text{curr}}$  and  $S_{\text{prev}}$

$S_{\text{prev}} \leftarrow S_{\text{curr}}$

**end for**

set after  $\{n\} \leftarrow \emptyset$

{Main Loop}

$S_{\text{prev}} = \emptyset, S_{\text{curr}} = \{1\}, S_{\text{next}} = \{2\}$

**while**  $S_{\text{next}} \neq \emptyset$  **do**

**if**  $S_{\text{curr}} \cdot \text{min} > S_{\text{next}} \cdot \text{min}$  **then**

$S_{\text{curr}} \leftarrow (S_{\text{curr}} \cup S_{\text{next}})$  and update pointers

$S_{\text{curr}} \cdot \text{min} \leftarrow \text{PoolV}_{\phi, z}(S_{\text{curr}})$

$S_{\text{next}} \leftarrow \text{set after } S_{\text{curr}}$

**while**  $S_{\text{prev}} \neq \emptyset$  and  $S_{\text{prev}} \cdot \text{min} > S_{\text{curr}} \cdot \text{min}$  **do**

$S_{\text{curr}} \leftarrow (S_{\text{prev}} \cup S_{\text{curr}})$  and update pointers

$S_{\text{curr}} \cdot \text{min} \leftarrow \text{PoolV}_{\phi, z}(S_{\text{curr}})$

$S_{\text{prev}} \leftarrow \text{set before } S_{\text{curr}}$

**end while**

**end if**

$S_{\text{prev}} \leftarrow S_{\text{curr}}, S_{\text{curr}} \leftarrow S_{\text{next}}, S_{\text{next}} \leftarrow \text{set after } S_{\text{next}}$

**end while**

{Output Solution}

**while**  $S_{\text{curr}} \neq \emptyset$  **do**

**for**  $i \in S_{\text{curr}}$  **do**

$y_i \leftarrow S_{\text{curr}} \cdot \text{min}$

**end for**

$S_{\text{curr}} \leftarrow \text{set before } S_{\text{curr}}$

**end while**

**return**  $y$

---

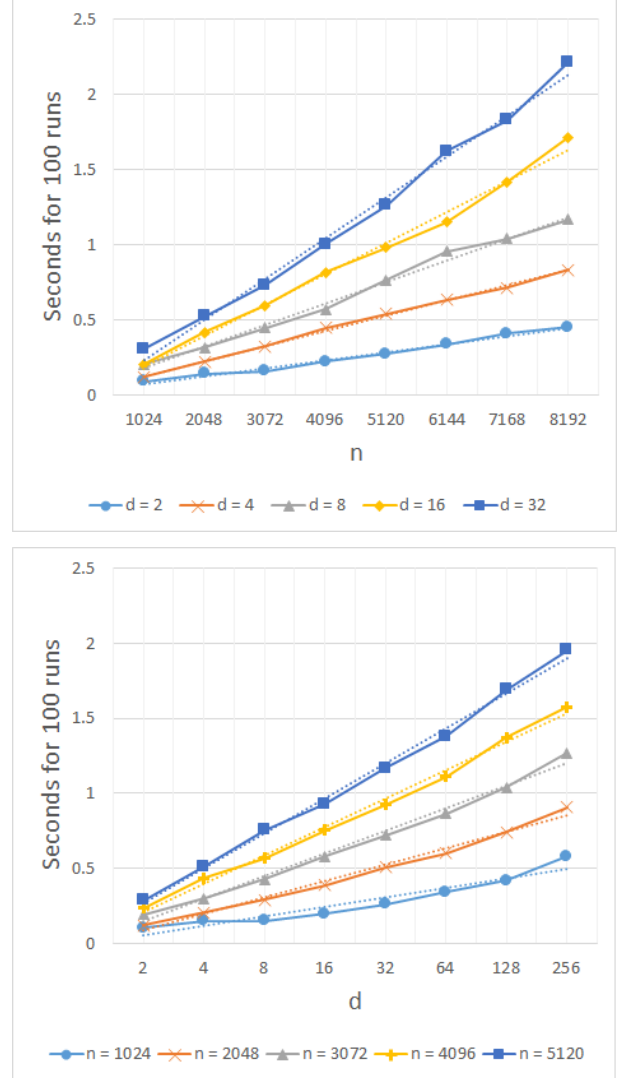

Figure 5: Running times of `MergeAndPool` when varying  $n$  and initial number of intervals  $d$ . The first graph varies  $n$  along the  $x$  axis, while the second has  $d$  (log-scale) along that axis. The complexity scales linearly with  $n$  and  $\log d$ .
